# Supplementary material
Source: Springer Nature journal article supplement (https://www.springermedizin.de/resource/supplementary/12916_2012_748_MOESM2_ESM.pdf/9598228)
Supplement: MOESM2 [file 9598228]

Anticipated clinical pathway for staging of confirmed muscle invasive bladder cancer\*

**Radiological work up\*\***

In order to determine

- Extent of local tumour invasion
  - Nodal involvement
  - Distant disease

**CT chest, abdomen and pelvis**

- Assessment of both local and distant disease (>T3b)

Recommendation based on well conducted trials without randomisation

**+/-MRI pelvis**

- Has some advantage for local staging over CT

Recommendation based on well conducted trials without randomisation

**+/-FDG-PET**

- No evidence for routine use

Recommendation based on meta-analysis of non randomised clinical trials

**+/-Bone scan**

- No evidence for routine use
- considered when bone alkaline phosphatase elevated or symptoms suggesting bone metastases

Recommendation made in absence of directly applicable trials
